# Supplementary material
Source: publisher figshare collection journal article supplement (https://acs.figshare.com/ndownloader/files/20179313)
Supplement: Supplementary file 1 [file 20179313]

## Supporting Information

### Real-Time Imaging of the Electrochemical Process in Na-O<sub>2</sub>

### Nanobatteries Using Pt@CNT and Pt<sub>0.8</sub>Ir<sub>0.2</sub>@CNT Air

#### Cathodes

*Yuanmin Zhu<sup>a,b</sup>, Fei Yang<sup>a</sup>, Mohan Guo<sup>c</sup>, Lang Chen<sup>c</sup> and Meng Gu<sup>a\*</sup>*

<sup>a</sup>Department of Materials Science and Engineering, and Guangdong Provincial Key Laboratory of Energy Materials for Electric Power, Southern University of Science and Technology, Shenzhen 518055, China

<sup>b</sup>SUSTech Academy for Advanced Interdisciplinary Studies, Southern University of Science and Technology, Shenzhen 518055, China

<sup>c</sup>Department of Physics, Southern University of Science and Technology, Shenzhen 518055, China

#### Content:

|     |                                                                                       |    |
|-----|---------------------------------------------------------------------------------------|----|
| 1.  | Description of Supplementary Movies .....                                             | 3  |
| 2.  | Supplementary Figures .....                                                           | 5  |
| 2.1 | Microstructure of the Pt@CNTs .....                                                   | 5  |
| 2.2 | Morphology evolution of a Pt@CNT cathode during discharge .....                       | 6  |
| 2.3 | Comparison experiment of Na and Pt@CNT without O <sub>2</sub> .....                   | 7  |
| 2.4 | NaO <sub>2</sub> decompositions without e-beam exposure .....                         | 8  |
| 2.5 | Microstructures of the as synthesized Pt <sub>0.8</sub> Ir <sub>0.2</sub> @CNTs ..... | 9  |
| 2.6 | Comparison experiment of Na-O <sub>2</sub> on pure CNTs .....                         | 11 |

|                                                                                                   |    |
|---------------------------------------------------------------------------------------------------|----|
| 2.7 <i>In situ</i> TEM of a Pt <sub>0.8</sub> Ir <sub>0.2</sub> @CNT cathode during cycling ..... | 12 |
| 2.8 STEM-EDS mapping of a Pt <sub>0.8</sub> Ir <sub>0.2</sub> @CNT after discharging.....         | 13 |
| 2.9 Typical <i>in situ</i> I-V curves and EIS .....                                               | 13 |
| 2.10 <i>In situ</i> TEM experiments at low beam voltage and dose .....                            | 14 |

# 1. Description of Supplementary Movies

## **Movie S1.avi**

*In situ* TEM movie showing the morphological evolution of a Pt deposited carbon nanotube (Pt@CNT) cathode against Na in an O<sub>2</sub> environment during discharging and charging. The movie S1 was recorded at 2 frames/second and is played at 30× speed.

## **Movie S2.avi**

Morphology evolution of a Pt@CNT oxygen cathode during the discharge process of a Na-O<sub>2</sub> nanobattery in (a) sodiation on CNT and (b) Na-O<sub>2</sub> reaction upon a -0.5V bias.

The movie S2 was recorded at 2 frames/second and is played at 10× speed.

## **Movie S3.avi**

Real time *in situ* experiments of Na-Pt@CNT nanobattery without oxygen environment and only found that the Na ions go through the CNT, leading the volume expansion. No bubble-like morphology was observed during the electrochemical process. The movie S3 was recorded at 2 frames/second and is played at 45× speed.

## **Movie S4.avi**

Time-resolved multiple cycles of the Na-O<sub>2</sub> nanobatteries at the same reaction area in Movie S1 were performed by *in situ* TEM. The movie S4 was recorded at 2 frames/second and is played at 45× speed.

## **Movie S5.avi**

Time-resolved *in situ* TEM movie shows the morphological evolution of the Pt<sub>0.8</sub>Ir<sub>0.2</sub>@CNT cathode against Na in an O<sub>2</sub> environment during discharge and charging processes. The movie S4 was recorded at 1 frames/second and is played at 30× speed.

### **Movie S6.avi**

Real time *in situ* SAEDPs to explore structural information on the phase evolution during the discharging and charging processes. The movie S6 was recorded at 1 frames/second and is played at 20× speed.

### **Movie S7.avi**

Movie S7 shows the corresponding morphological evolution of the  $\text{Pt}_{0.8}\text{Ir}_{0.2}\text{@CNT}$  cathode monitored in Movie S6. The movie S7 was recorded at 1 frames/second and is played at 30× speed.

## 2. Supplementary Figures

### 2.1 Microstructure of the Pt@CNTs

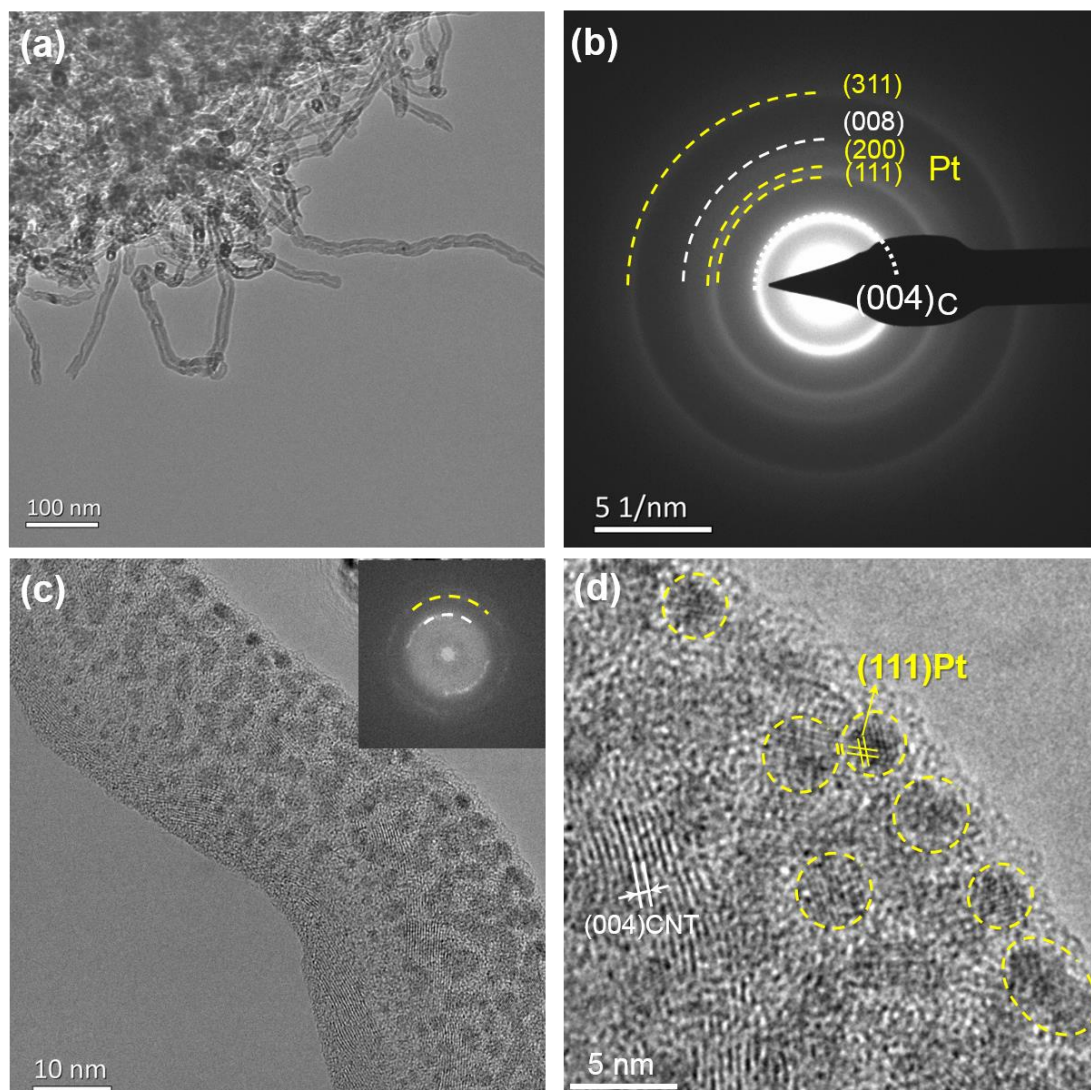

Figure S1 The microstructure of the pristine Pt doped carbon nanotubes (Pt@CNTs). (a) Transmission electron microscopy (TEM) image of the pristine Pt@CNTs glued on the half grid and the corresponding selected area electron diffraction patterns (EDPs). (b). High resolution TEM images shows the distribution of Pt nanoparticles on the CNT surface (c) and the lattices of Pt particles and CNT (d).

## 2.2 Morphology evolution of a Pt@CNT cathode during discharge

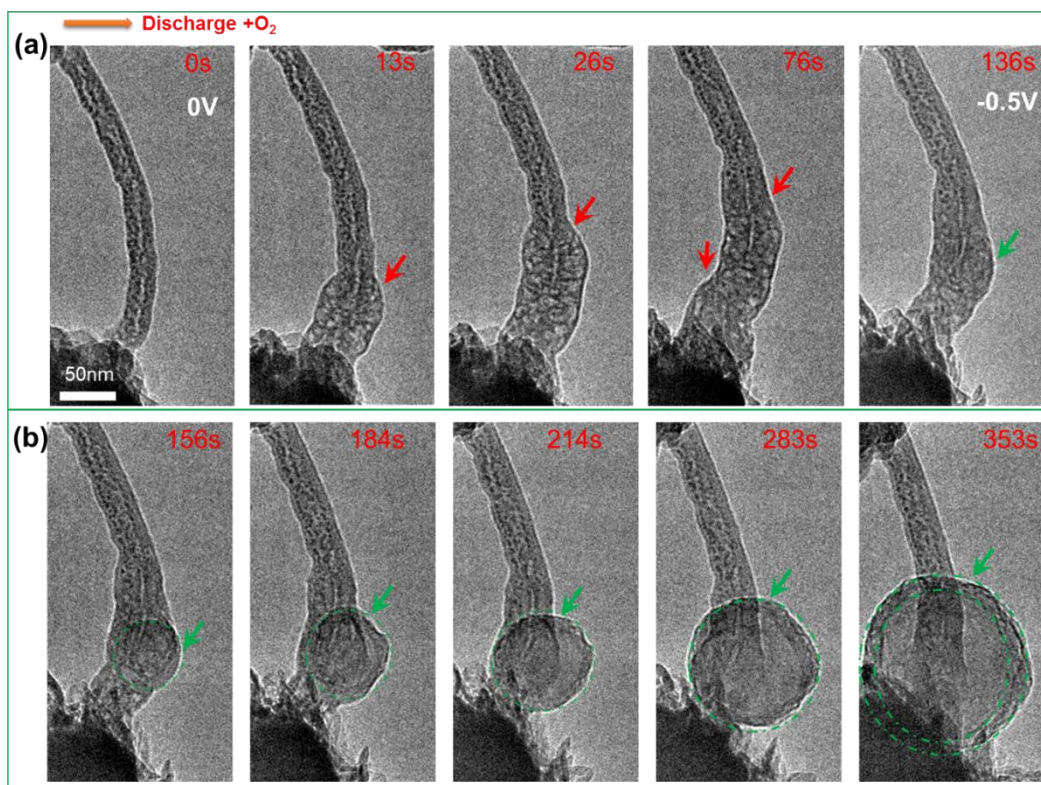

Figure S2 Morphology evolution of a Pt@CNT oxygen cathode during the discharge process of a Na-O<sub>2</sub> nanobattery in (a) spontaneously sodiation on CNT and (b) Na-O<sub>2</sub> reaction upon a -0.5V bias accompany with a bubble-like structure appeared. The reaction areas are pointed out by arrows.



## 2.3 Comparison experiment of Na and Pt@CNT without O<sub>2</sub>

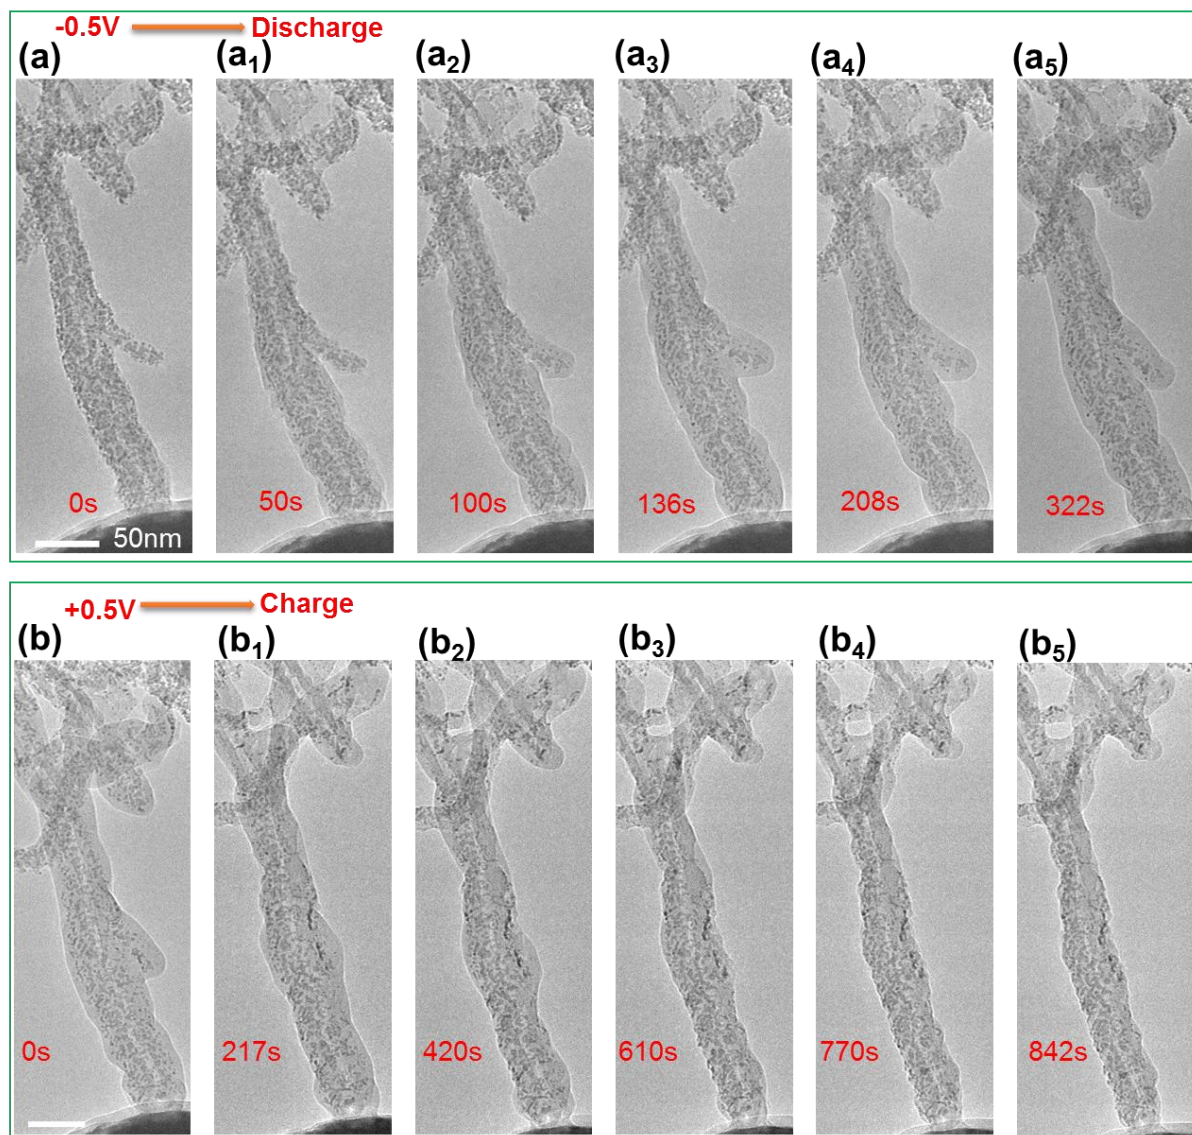

Figure S3 The Sodiatio-Desodiation cycle of Pt@CNT without oxygen environment for comparison. (a) Discharging at -0.5V; (b) Charging at +0.5V.

## 2.4 NaO<sub>2</sub> decompositions without e-beam exposure

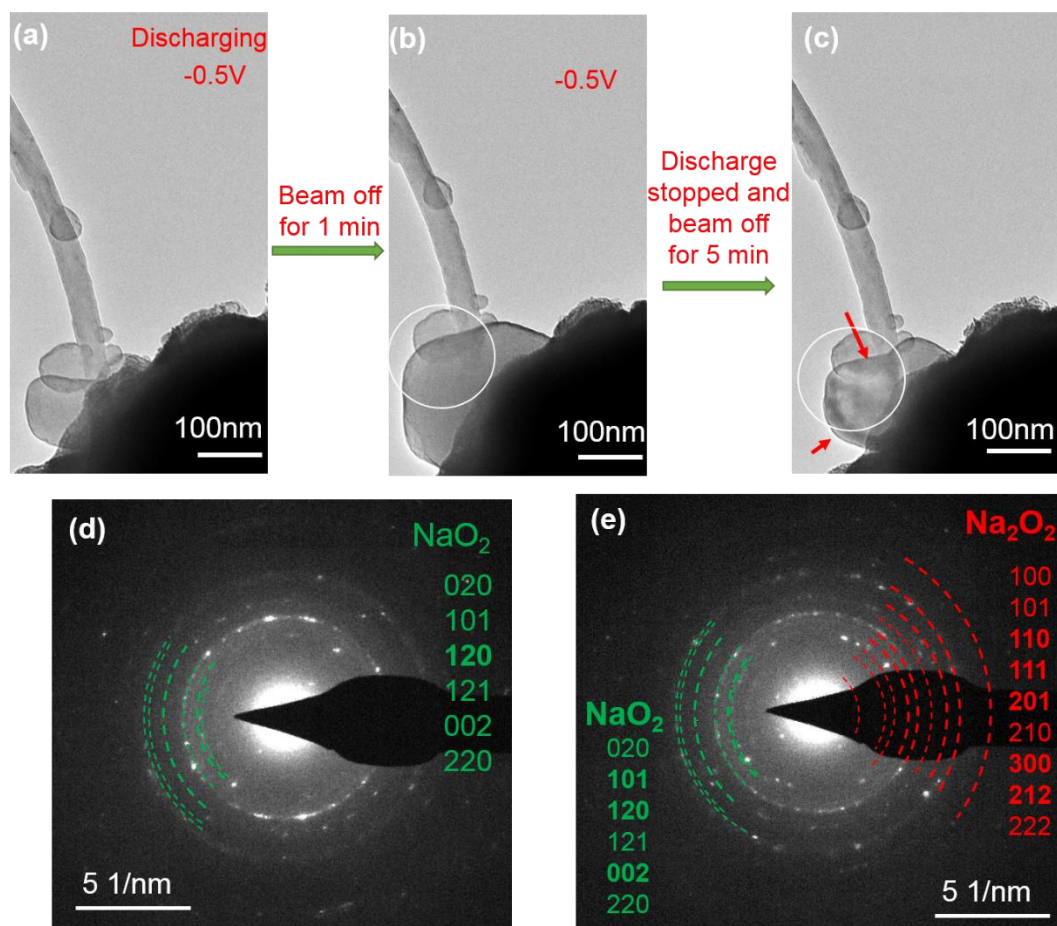

Figure S4 TEM morphologies evolution of the Na-O<sub>2</sub> cell discharging without electron beam exposure. The e-beam opened only when images were acquired at (a) 0 min (b) 1 min and (c) 6min. (d) The corresponding SAED patterns from the white circled area in (b). (e) The corresponding SAED patterns from circled area in (c).



## 2.5 Microstructures of the as synthesized $\text{Pt}_{0.8}\text{Ir}_{0.2}@\text{CNTs}$

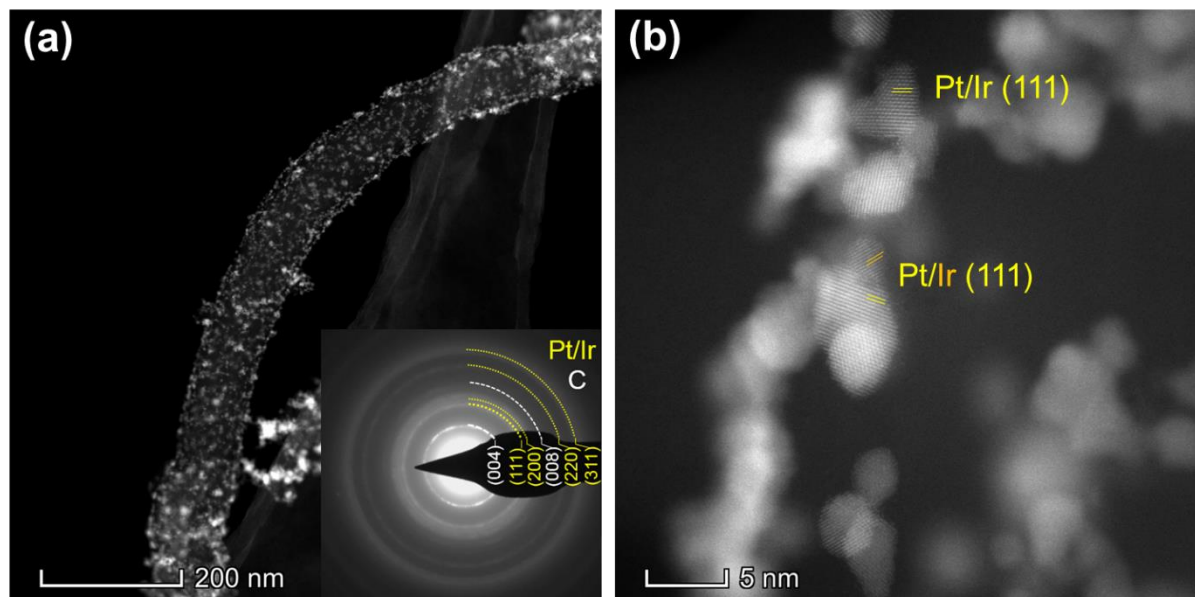

Figure S5 microstructure of the synthesized  $\text{Pt}_{0.8}\text{Ir}_{0.2}@\text{CNT}$ . (a) High angle annular dark field scanning transmission electron microscopy (HAADF-STEM) image showing homogeneously distributed Pt/Ir bimetallic catalysts on CNT. (b) High resolution STEM investigation gives further insight of the Pt/Ir catalysts.

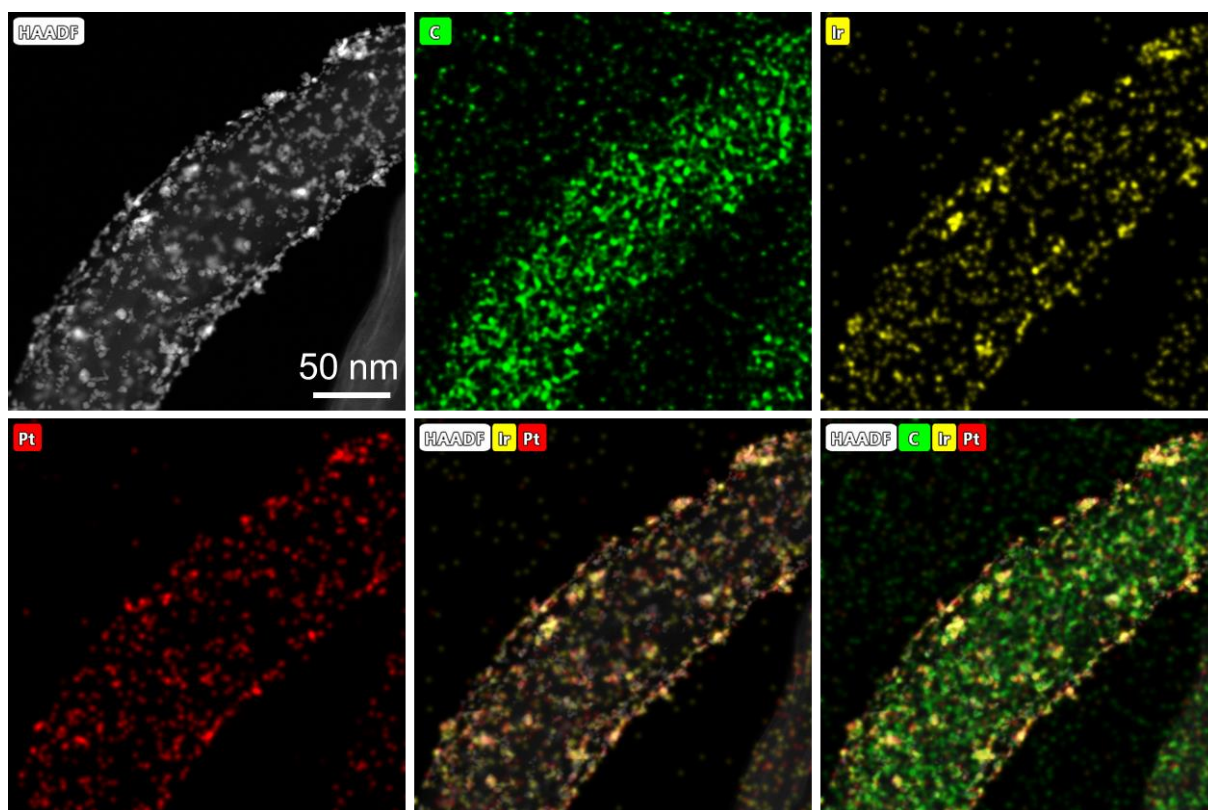

Figure S6 High resolution STEM-EDS mapping of  $\text{Pt}_{0.8}\text{Ir}_{0.2}@\text{CNT}$  demonstrating the composition of the Pt/Ir nanoparticlaes. (a) HAADF image; (b) C map; (c) Ir map; (d) Pt map; (e) overlapping maps of Pt, Ir; (f) overlapping maps of C, Pt, Ir.

## 2.6 Comparison experiment of Na-O<sub>2</sub> on pure CNTs

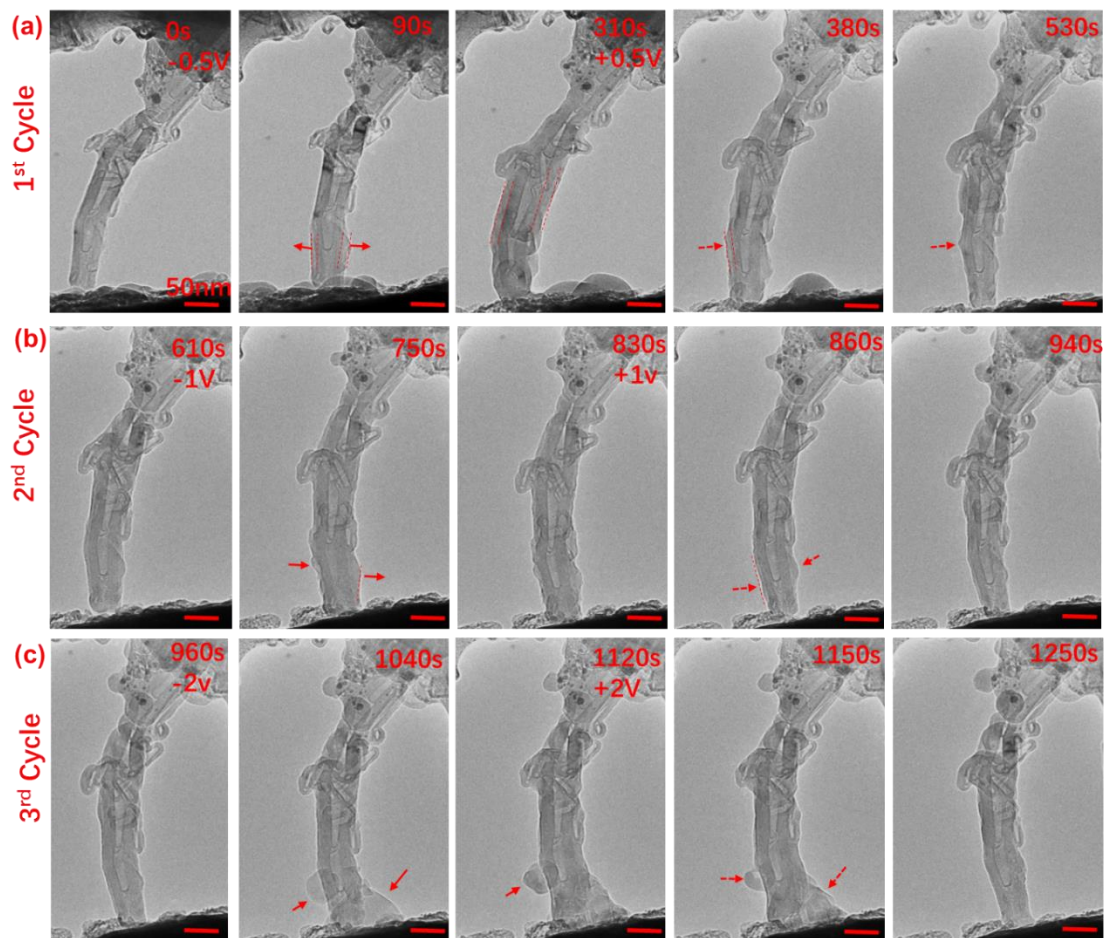

Figure S7 Real-time *in situ* TEM images depict the morphological evolution during the discharging and charging process of a pure CNT air cathode without catalyst against Na metal anode in O<sub>2</sub> environment with the first 3 cycles shown in (a) 1<sup>st</sup> cycle, (b) 2<sup>nd</sup> cycle and (c) 3<sup>rd</sup> cycle. At the 3<sup>rd</sup> cycle, the Na-O<sub>2</sub> reaction happened combining with the Na<sub>2</sub>O<sub>2</sub> nanospheres formation and decomposition under a relative high bias voltage.

## 2.7 *In situ* TEM of a $\text{Pt}_{0.8}\text{Ir}_{0.2}@ \text{CNT}$ cathode during cycling

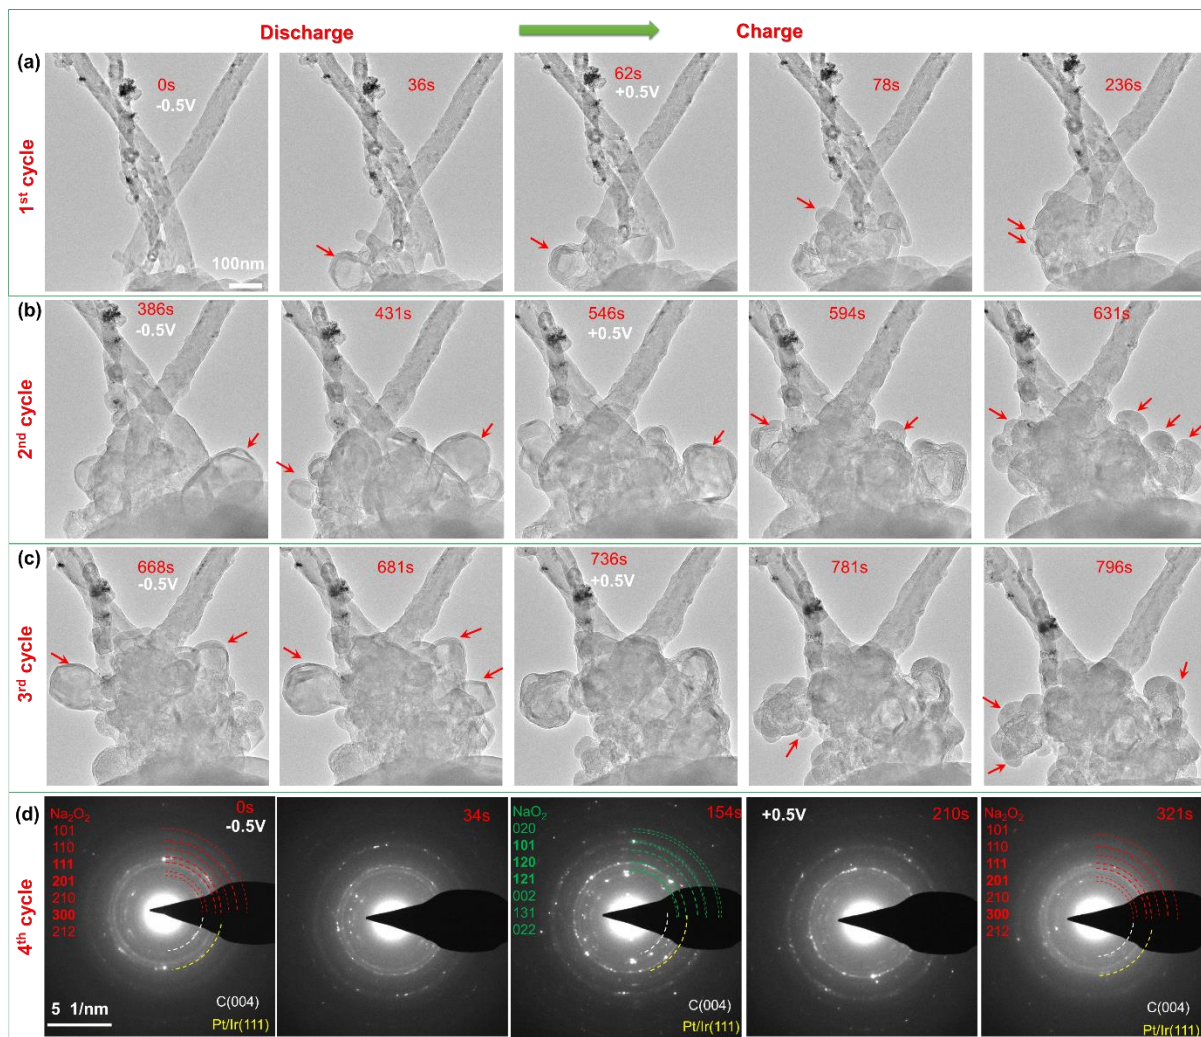

**Figure S8** Time-resolved *in situ* TEM images illustrate the morphological evolution of a  $\text{Pt}_{0.8}\text{Ir}_{0.2}@ \text{CNT}$  cathode during discharge and charging against Na in an  $\text{O}_2$  environment. Morphology evolution of the Na- $\text{O}_2$  nanocell during the first (a), second (b), and third cycle. (d) The real-time evolution of EDPs at the same reaction area during the fourth cycle.



## 2.8 STEM-EDS mapping of a $\text{Pt}_{0.8}\text{Ir}_{0.2}@\text{CNT}$ after discharging

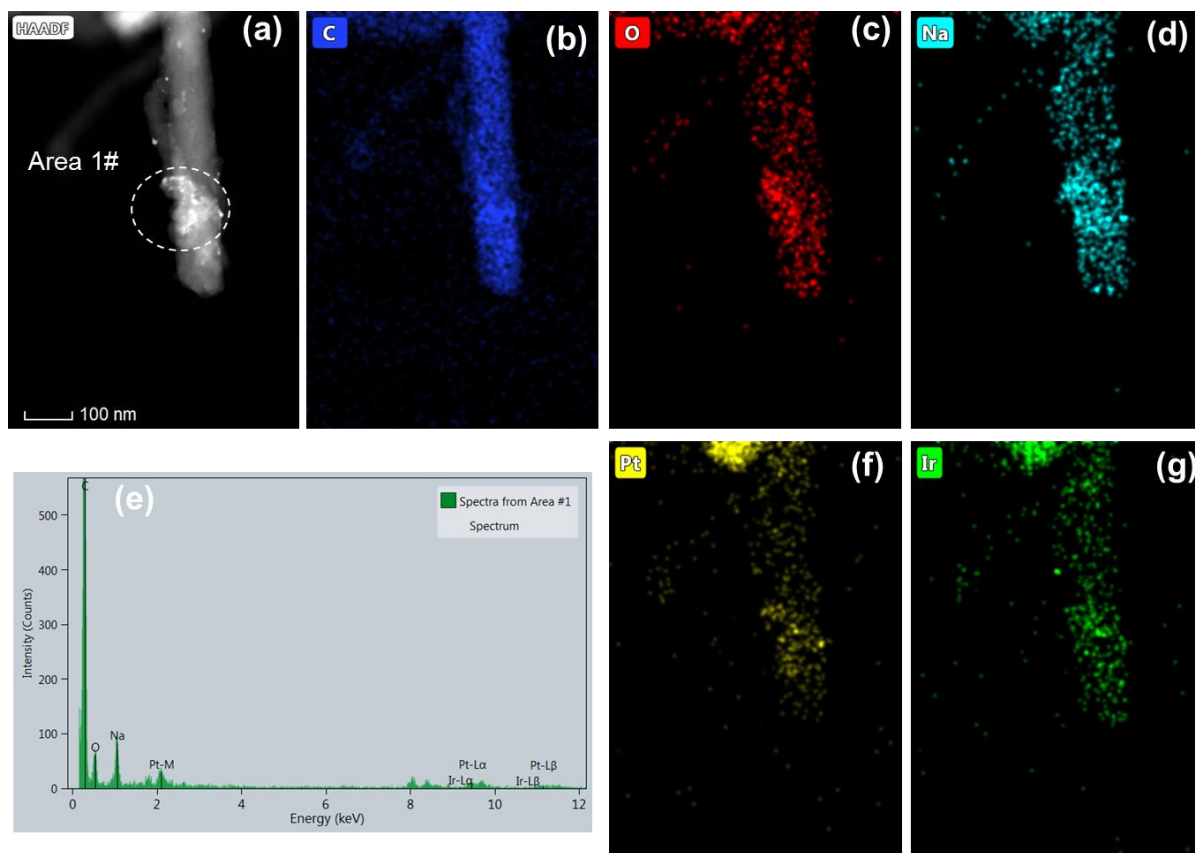

Figure S9 STEM-EDS mapping of a  $\text{Pt}_{0.8}\text{Ir}_{0.2}@\text{CNT}$  after discharging process as a Na-O<sub>2</sub> cell. (a) HAADF image; (b) C map; (c) O map; (d) Na map (e) EDS spectrum from the area 1# in (a), (f) Pt map; (g) Ir Map.

## 2.9 Typical *in situ* I-V curves and EIS

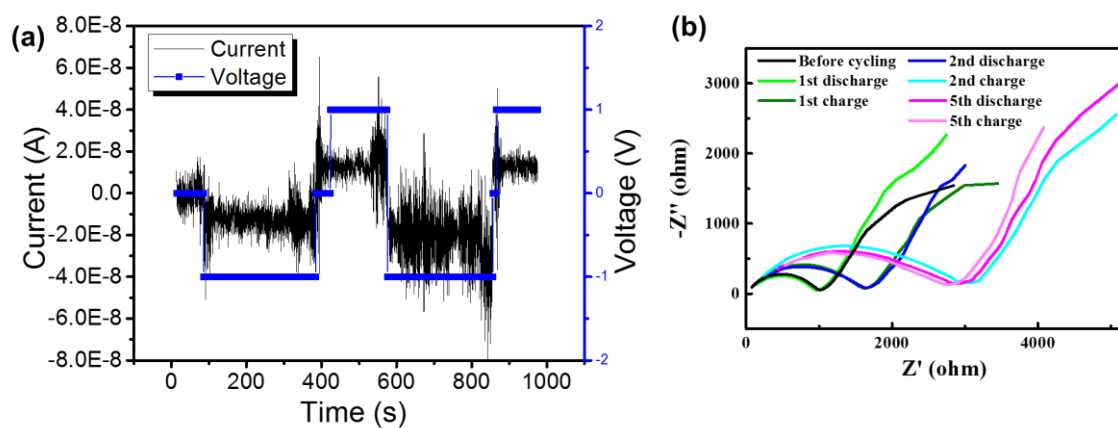

Figure S10 (a) The typical voltage and current density curves v.s. time during the discharging and charging cycles. (b) Electrochemical impedance spectrum (EIS) of Na-O<sub>2</sub> liquid cells with the Pt/Ir@CNT cathode.

## 2.10 *In situ* TEM experiments at low beam voltage and dose

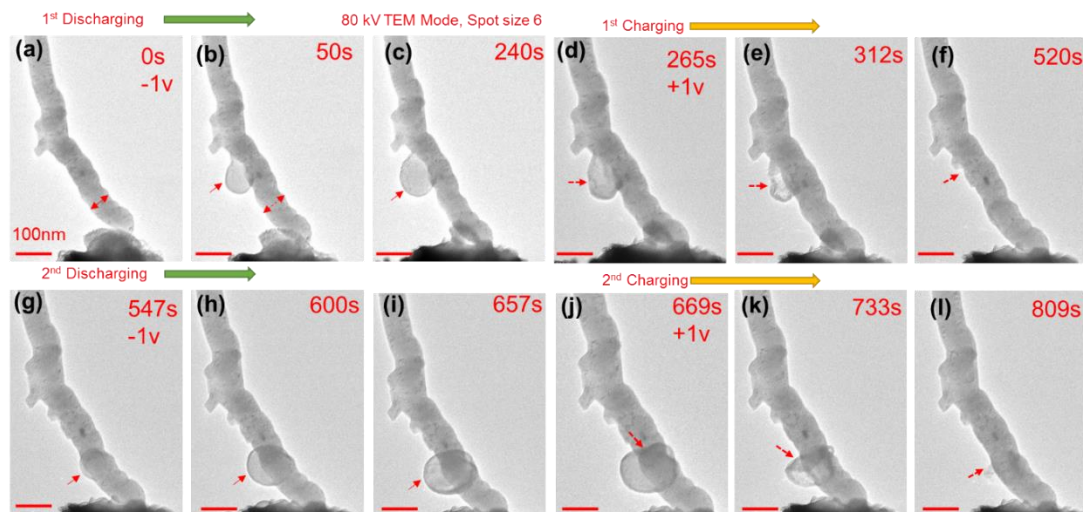

Figure S11 Real-time *in situ* low beam voltage (80 kV) TEM images depict the morphological evolution during the discharging and charging process of a Pt<sub>0.8</sub>Ir<sub>0.2</sub>CNT air cathode against Na metal anode in O<sub>2</sub> environment. (a-f) 1<sup>st</sup> cycle, (g-l) 2<sup>nd</sup> cycle. The spot size was set as 6 to decrease the electron beam effect on the samples and beam screen current is controlled below 0.1 nA.



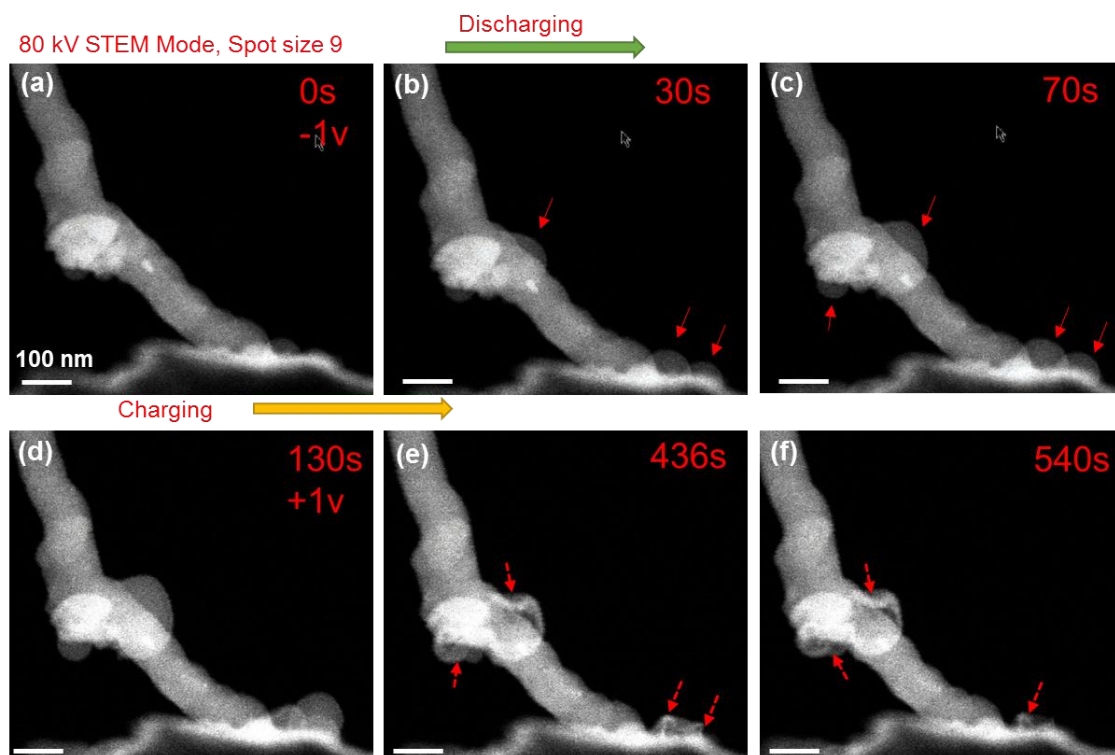

Figure S12 Real-time *in situ* low beam voltage (80 kV) STEM images show the morphological evolution during the discharging and charging process of a  $\text{Pt}_{0.8}\text{Ir}_{0.2}\text{CNT}$  air cathode against Na metal anode in  $\text{O}_2$  environment. (a-c) Discharging, (d-f) Charging. The spot size was set as 9 to decrease the electron beam effect on the samples. In STEM mode, the e-beam effect is minimized as we only took images intermittently.
